# Supplementary material for: Analysis of Potential Genes and Pathways Involved in the Pathogenesis of Acne by Bioinformatics
Source: Hindawi journal article supplement (doi:10.1155/2019/3739086), 2019-06-09
Supplement: f1 [file 3739086.f1.pdf]

## Supplementary Materials

**Table S1.** KEGG pathway enrichment analysis for the common upregulated DEGs of GSE6475 and GSE53795 in acne.

| Term     | Description                               | Count | <i>p</i> -Value | Genes                                                                                                      |
|----------|-------------------------------------------|-------|-----------------|------------------------------------------------------------------------------------------------------------|
| hsa04060 | Cytokine-cytokine receptor interaction    | 14    | 3.70E-06        | <i>TNFRSF6B, CXCL1, CCR1, CXCL2, CCL19, CXCL8, CXCR2, IL7R, TNFRSF1B, CXCR4, CCR2, CSF3R, IL1B, CSF2RB</i> |
| hsa04062 | Chemokine signaling pathway               | 12    | 8.66E-06        | <i>CXCL1, RAC2, LYN, CXCR4, CCR1, HCK, CCR2, CXCL2, CXCL8, CCL19, CXCR2, PIK3R2</i>                        |
| hsa05150 | Staphylococcus aureus infection           | 11    | 4.03E-10        | <i>ICAM1, C3AR1, C5AR1, CFB, FCGR1A, FPR1, ITGB2, FCGR2A, FPR2, FCGR3A, FCGR3B</i>                         |
| hsa05152 | Tuberculosis                              | 11    | 3.42E-05        | <i>CR1, FCGR1A, FCER1G, IL1B, ITGB2, FCGR2A, CLEC7A, CTSS, FCGR3A, FCGR3B, CD14</i>                        |
| hsa04145 | Phagosome                                 | 9     | 3.26E-04        | <i>CTSL, FCGR1A, ITGB2, FCGR2A, CLEC7A, CTSS, FCGR3A, FCGR3B, CD14</i>                                     |
| hsa05140 | Leishmaniasis                             | 8     | 1.61E-05        | <i>CR1, FCGR1A, IL1B, ITGB2, FCGR2A, ITGA4, FCGR3A, FCGR3B</i>                                             |
| hsa04064 | NF-kappa B signaling pathway              | 8     | 6.10E-05        | <i>ICAM1, LYN, BCL2A1, CXCL8, CCL19, IL1B, CD14, PLAU</i>                                                  |
| hsa05146 | Amoebiasis                                | 8     | 2.13E-04        | <i>CXCL8, SERPINB1, IL1B, SERPINB4, ITGB2, SERPINB3, CD14, PIK3R2</i>                                      |
| hsa04668 | TNF signaling pathway                     | 8     | 2.26E-04        | <i>CXCL1, ICAM1, TNFRSF1B, CXCL2, IL1B, MMP3, SELE, PIK3R2</i>                                             |
| hsa04650 | Natural killer cell mediated cytotoxicity | 8     | 5.05E-04        | <i>ICAM1, RAC2, FCER1G, GZMB, ITGB2, FCGR3A, FCGR3B, PIK3R2</i>                                            |
| hsa04380 | Osteoclast differentiation                | 8     | 7.74E-04        | <i>LILRB2, CYBB, FCGR1A, IL1B, FCGR2A, FCGR3A, FCGR3B, PIK3R2</i>                                          |
| hsa04514 | Cell adhesion molecules (CAMs)            | 8     | 0.001245        | <i>ICAM1, PTPRC, SELL, VCAN, ITGB2, ITGA4, CDH3, SELE</i>                                                  |
| hsa05134 | Legionellosis                             | 7     | 3.39E-05        | <i>CXCL1, CR1, CXCL2, CXCL8, IL1B, ITGB2, CD14</i>                                                         |
| hsa04610 | Complement and coagulation cascades       | 7     | 1.37E-04        | <i>C3AR1, CR1, C5AR1, CFB, SERPINA1, PLAU, PLAU</i>                                                        |
| hsa04666 | Fc gamma R-mediated phagocytosis          | 7     | 4.04E-04        | <i>PTPRC, RAC2, LYN, FCGR1A, HCK, FCGR2A, PIK3R2</i>                                                       |
| hsa04640 | Hematopoietic cell lineage                | 7     | 4.89E-04        | <i>CR1, FCGR1A, IL1B, CSF3R, ITGA4, IL7R, CD14</i>                                                         |
| hsa05323 | Rheumatoid arthritis                      | 7     | 5.20E-04        | <i>CTSL, ICAM1, CXCL8, IL1B, ITGB2, MMP3, MMP1</i>                                                         |

|          |                                         |   |          |                                                      |
|----------|-----------------------------------------|---|----------|------------------------------------------------------|
| hsa05202 | Transcriptional misregulation in cancer | 7 | 0.012794 | <i>FCGR1A, BCL2A1, CXCL8, GZMB, MMP3, CD14, PLAU</i> |
| hsa04978 | Mineral absorption                      | 6 | 1.43E-04 | <i>MT1M, MT2A, MT1E, STEAP1, MT1G, MT1F</i>          |
| hsa05144 | Malaria                                 | 6 | 2.40E-04 | <i>ICAM1, CR1, CXCL8, IL1B, ITGB2, SELE</i>          |
| hsa04670 | Leukocyte transendothelial migration    | 6 | 0.010633 | <i>ICAM1, RAC2, CXCR4, ITGB2, ITGA4, PIK3R2</i>      |
| hsa05132 | Salmonella infection                    | 5 | 0.015572 | <i>CXCL1, CXCL2, CXCL8, IL1B, CD14</i>               |
| hsa04620 | Toll-like receptor signaling pathway    | 5 | 0.034504 | <i>CXCL8, IL1B, CD14, SPP1, PIK3R2</i>               |
| hsa04621 | NOD-like receptor signaling pathway     | 4 | 0.027007 | <i>CXCL1, CXCL2, CXCL8, IL1B</i>                     |
| hsa04664 | Fc epsilon RI signaling pathway         | 4 | 0.044255 | <i>RAC2, LYN, FCER1G, PIK3R2</i>                     |

**Notes:** Count, the number of DEGs.

**Abbreviations:** KEGG, Kyoto Encyclopedia of Genes and Genomes; DEGs, differentially expressed genes.

**Table S2:** The hub genes in the PPI network (degree  $\geq 10$ )

| ID            | Degree | ID           | Degree | ID            | Degree | ID            | Degree |
|---------------|--------|--------------|--------|---------------|--------|---------------|--------|
| <i>FPR2</i>   | 24     | <i>ICAM1</i> | 16     | <i>C5AR1</i>  | 14     | <i>HCK</i>    | 12     |
| <i>CXCL8</i>  | 23     | <i>FPR1</i>  | 16     | <i>GPR183</i> | 14     | <i>PIK3R2</i> | 12     |
| <i>ITGB2</i>  | 23     | <i>CCR2</i>  | 16     | <i>CXCR2</i>  | 13     | <i>LYN</i>    | 11     |
| <i>C3AR1</i>  | 21     | <i>SAA1</i>  | 16     | <i>CYBB</i>   | 13     | <i>PLAU</i>   | 10     |
| <i>CXCL1</i>  | 19     | <i>CXCR4</i> | 15     | <i>CCR1</i>   | 13     | <i>PLAUR</i>  | 10     |
| <i>PTPRC</i>  | 17     | <i>CXCL2</i> | 14     | <i>FCGR1A</i> | 13     | <i>FCGR2A</i> | 10     |
| <i>LILRB2</i> | 17     | <i>CCL19</i> | 14     | <i>TIMP1</i>  | 12     | <i>CD47</i>   | 10     |
| <i>FCER1G</i> | 17     | <i>CD53</i>  | 14     | <i>IL1B</i>   | 12     |               |        |

**Note:** Degree, the number of interaction between two genes in PPI network.

**Abbreviations:** PPI, protein–protein interaction.
